# Supplementary material
Source: PubMed Central journal article supplement (PMC10656032)
Supplement: NIHMS1652452-supplement-1.pdf [file NIHMS1652452-supplement-1.pdf]

## SUPPORTING DOCUMENTS

**Supplementary Table 1.** Patient parameters stratified by spontaneous survival at day 21 (deceased/transplanted vs. transplant-free survivors).

|                                           | Deceased/Transplanted<br>(N = 365) |                  | Transplant-free<br>Survivors<br>(N = 704) |                  | P-<br>value |
|-------------------------------------------|------------------------------------|------------------|-------------------------------------------|------------------|-------------|
|                                           | N                                  |                  | N                                         |                  |             |
| <b>Age (years)</b>                        | 365                                | 38 (28-47)       | 704                                       | 36 (28-46)       | 0.06        |
| <b>Sex (male)</b>                         | 365                                | 88 (24.1%)       | 704                                       | 180 (25.6%)      | 0.60        |
| <b>King's College Criteria (days 1-7)</b> | 365                                | 128 (35.1%)      | 704                                       | 78 (11.1%)       | <0.001      |
| <b>ALFSG Prognostic Index (admission)</b> |                                    |                  |                                           |                  |             |
| Survival Predicted Probability $\geq$ 80% | 342                                | 36 (10.5%)       | 649                                       | 331 (51.0%)      | <0.001      |
| <b>Highest MELD (days 1-7)</b>            | 357                                | 33.7 (28.2-38.8) | 701                                       | 24.0 (14.1-31.0) | <0.001      |
| <b>Coma Grade 3/4 (days 1-7)</b>          | 353                                | 323 (91.5%)      | 685                                       | 361 (52.7%)      | <0.001      |
| <b>Organ Support (days 1-7)</b>           |                                    |                  |                                           |                  |             |
| Mechanical Ventilation                    | 365                                | 331 (90.7%)      | 704                                       | 361 (51.3%)      | <0.001      |
| Vasopressors                              | 365                                | 240 (65.8%)      | 704                                       | 137 (19.5%)      | <0.001      |
| Continuous Renal Replacement Therapy      | 365                                | 78 (21.4%)       | 704                                       | 96 (13.6%)       | 0.001       |
| <b>ICP Directed Therapies (days 1-7)</b>  |                                    |                  |                                           |                  |             |
| ICP monitor                               | 365                                | 82 (22.5%)       | 704                                       | 55 (7.8%)        | <0.001      |
| Mannitol                                  | 365                                | 123 (33.7%)      | 704                                       | 94 (13.4%)       | <0.001      |
| Barbiturate                               | 365                                | 49 (13.4%)       | 704                                       | 27 (3.8%)        | <0.001      |
| Hypothermia                               | 365                                | 32 (8.8%)        | 704                                       | 36 (5.1%)        | 0.020       |
| Sedatives                                 | 365                                | 282 (77.3%)      | 704                                       | 406 (57.7%)      | <0.001      |
| <b>Blood Products (days 1-7)</b>          |                                    |                  |                                           |                  |             |
| Red Blood Cells                           | 365                                | 163 (44.7%)      | 704                                       | 165 (23.4%)      | <0.001      |
| Fresh Frozen Plasma                       | 365                                | 253 (69.3%)      | 704                                       | 245 (34.8%)      | <0.001      |
| Recombinant Factor VIIA                   | 365                                | 13 (3.6%)        | 704                                       | 8 (1.1%)         | 0.007       |
| Platelets                                 | 365                                | 125 (34.2%)      | 704                                       | 87 (12.4%)       | <0.001      |
| <b>ICU Complications (days 1-</b>         |                                    |                  |                                           |                  |             |

|                                              |     |             |     |             |        |
|----------------------------------------------|-----|-------------|-----|-------------|--------|
| <b>7)</b>                                    |     |             |     |             |        |
| Seizures                                     | 365 | 47 (12.9%)  | 704 | 24 (3.4%)   | <0.001 |
| Arrhythmia                                   | 365 | 109 (29.9%) | 704 | 126 (17.9%) | <0.001 |
| Gastrointestinal Bleeding                    | 365 | 53 (14.5%)  | 704 | 41 (5.8%)   | <0.001 |
| <b>N-acetylcysteine</b>                      |     |             |     |             |        |
| Intravenous                                  | 365 | 299 (81.9%) | 704 | 583 (82.8%) | 0.72   |
| Oral                                         | 365 | 236 (64.7%) | 704 | 426 (60.5%) | 0.19   |
| <b>Psychological Comorbidities</b>           | 365 | 188 (51.5%) | 704 | 387 (55.0%) | 0.28   |
| Depression                                   | 307 | 130 (42.3%) | 576 | 259 (45.0%) | 0.46   |
| Schizophrenia                                | 182 | 5 (2.7%)    | 325 | 8 (2.5%)    | 0.85   |
| Chronic Pain                                 | 178 | 1 (0.6%)    | 318 | 1 (0.3%)    | 0.68   |
| Bipolar Disorder                             | 202 | 25 (12.4%)  | 391 | 74 (18.9%)  | 0.043  |
| Anxiety                                      | 212 | 35 (16.5%)  | 400 | 83 (20.8%)  | 0.21   |
| <b>Overdose Intent</b>                       |     |             |     |             | 0.58   |
| Intentional                                  | 317 | 126 (39.7%) | 639 | 266 (41.6%) |        |
| Unintentional                                | 317 | 191 (60.2%) | 639 | 373 (58.4%) |        |
| <b>Intravenous Drug Use</b>                  | 359 | 23 (6.4%)   | 699 | 69 (9.9%)   | 0.06   |
| <b>Intracranial Hypertension (days 1-21)</b> | 215 | 132 (61.4%) | 321 | 71 (22.1%)  | <0.001 |
| <b>Death (days 1-21)</b>                     | 342 | 273 (79.8%) | 704 | 0 (0.0%)    | <0.001 |
| Cerebral Edema Death                         | 340 | 83 (24.4%)  | 704 | 0 (0.0%)    | <0.001 |
| <b>Listed for Liver Transplantation</b>      | 365 | 157 (43.0%) | 704 | 92 (13.1%)  | <0.001 |
| <b>Received Liver Transplant (days 1-21)</b> | 364 | 100 (27.5%) | 704 | 0 (0.0%)    | <0.001 |

Abbreviations: *ALFSG*, Acute Liver Failure Study Group; *ICP*, intracranial pressure;

*ICU*, intensive care unit; *MELD*, model for end stage liver disease.

**Supplementary Table 2.** Biochemical and organ support parameters at admission, stratified by spontaneous survival at day 21 (died/transplanted vs. transplant-free survivors).

|                                        |          | Deceased/Transplanted<br>(N = 365) |                        | Transplant-free<br>Survivors<br>(N = 704) |                       | P-value |
|----------------------------------------|----------|------------------------------------|------------------------|-------------------------------------------|-----------------------|---------|
| Biochemistry                           |          | N                                  |                        | N                                         |                       |         |
| Hemoglobin (g/L)                       |          | 362                                | 103 (91-121)           | 695                                       | 111 (95-127)          | <0.001  |
| White Blood Cells (10 <sup>9</sup> /L) |          | 362                                | 11.0 (6.8-16.1)        | 695                                       | 8.8 (6.2-12.8)        | <0.001  |
| Platelets (10 <sup>9</sup> /L)         |          | 362                                | 112 (68-166)           | 689                                       | 131 (91-184)          | <0.001  |
| INR                                    |          | 356                                | 3.6 (2.4-5.6)          | 688                                       | 2.7 (1.9-4.0)         | <0.001  |
| AST (IU/L)                             |          | 362                                | 5311<br>(2357-9301)    | 693                                       | 2852<br>(1160-6660)   | <0.001  |
| ALT (IU/L)                             |          | 361                                | 4100<br>(1965-6534)    | 693                                       | 3543<br>(2031-5867)   | 0.09    |
| Bilirubin                              | (µmol/L) | 362                                | 83.8<br>(59.9-121.4)   | 687                                       | 70.1<br>(41.0-104.3)  | <0.001  |
|                                        | (mg/dL)  |                                    | 4.9<br>(3.5-7.1)       |                                           | 4.1<br>(2.4-6.1)      |         |
| pH                                     |          | 336                                | 7.40<br>(7.32-7.47)    | 563                                       | 7.42<br>(7.36-7.47)   | <0.001  |
| Ammonia (venous)<br>(µmol/L)           |          | 138                                | 148 (102-258)          | 273                                       | 89 (61-134)           | <0.001  |
| Creatinine                             | (µmol/L) | 365                                | 212.2<br>(123.8-309.4) | 697                                       | 123.8<br>(70.7-256.4) | <0.001  |
|                                        | (mg/dL)  |                                    | 2.4<br>(1.4-3.5)       |                                           | 1.4<br>(0.8-2.9)      |         |
| Lactate (mmol/L)                       |          | 253                                | 7.8 (4.7-12.8)         | 428                                       | 2.9 (1.8-5.0)         | <0.001  |
| Phosphate (µmol/L)                     |          | 311                                | 1.06<br>(0.68-1.52)    | 616                                       | 0.74<br>(0.52-1.07)   | <0.001  |
| <b>King's College Criteria met</b>     |          | 365                                | 83 (22.7%)             | 704                                       | 59 (8.4%)             | <0.001  |
| <b>ALFSG Prognostic Index</b>          |          |                                    |                        |                                           |                       |         |
| Survival Predicted Probability ≥ 80%   |          | 342                                | 36 (10.5%)             | 649                                       | 331 (51.0%)           | <0.001  |
| <b>MELD</b>                            |          | 353                                | 36.0<br>(29.2-41.6)    | 673                                       | 27.3<br>(18.9-35.1)   | <0.001  |
| <b>Coma Grade 3/4</b>                  |          | 353                                | 259 (73.4%)            | 677                                       | 301 (44.5%)           | <0.001  |
| <b>Organ support</b>                   |          |                                    |                        |                                           |                       |         |
| Mechanical Ventilation                 |          | 365                                | 283 (77.5%)            | 704                                       | 313 (44.5%)           | <0.001  |
| Vasopressors                           |          | 365                                | 172 (47.1%)            | 704                                       | 91 (12.9%)            | <0.001  |
| Continuous Renal                       |          | 364                                | 50 (13.7%)             | 704                                       | 66 (9.4%)             | 0.030   |

|                     |  |  |  |  |  |
|---------------------|--|--|--|--|--|
| Replacement Therapy |  |  |  |  |  |
|---------------------|--|--|--|--|--|

Abbreviations: *ALFSG*, Acute Liver Failure Study Group; *ALT*, alanine aminotransferase; *AST*, aspartate aminotransferase; *INR*, international normalized ratio, *MELD*, model for end stage liver disease.

Journal Pre-proof
